# Supplementary material
Source: Springer Nature journal article supplement (https://www.springermedizin.de/resource/supplementary/12889_2013_5882_MOESM1_ESM.docx/9495984)
Supplement: MOESM1 [file 9495984]

**Figure**

Figure 1 The Content Model of the ICD 11
